# Supplementary material
Source: HighWire-hosted journal article supplement (https://www.rcpjournals.org/highwire/filestream/12768/field_highwire_adjunct_files/4/S2._Patient_information_leaflets_provided.pdf)
Supplement: S2._Patient_information_leaflets_provided.pdf [file S2._Patient_information_leaflets_provided.pdf]

|                                                                                            |
|--------------------------------------------------------------------------------------------|
| <b>Patient Information (Self-Management) Leaflets</b>                                      |
| Recovering from COVID Leaflet 1 (general health)                                           |
| Recovering from COVID Leaflet 2 (psychological health)                                     |
| Breathlessness After COVID Leaflet                                                         |
| Cough After COVID Leaflet                                                                  |
| Royal College of Occupational Therapists (RCOT) How to Conserve Your Energy Leaflet        |
| RCOT How to Manage Post-Viral Fatigue After COVID-19 Leaflet                               |
| Managing Adult Malnutrition: Eating Well During and After COVID-19 Illness Leaflet         |
| Managing Adult Malnutrition: Improving Your Nutrition During and After COVID-19 Leaflet    |
| Bereavement 'What to do when someone close to you dies during the pandemic period' Leaflet |
| Smoking Cessation Advice Leaflet                                                           |
| Post-COVID Voice Recovery Leaflet                                                          |
| Smell Training Advice Leaflet                                                              |
| Musculoskeletal Pains After COVID Advice Leaflet                                           |
| Memory and Concentration After COVID Advice Leaflet                                        |

## **S2. Patient information (self-management) leaflets provided to patients following Virtual Review**
